# Supplementary material for: High level of fatty liver index predicts new onset of diabetes mellitus during a 10-year period in healthy subjects
Source: PubMed Central journal article supplement (PMC8213804; doi:10.1038/s41598-021-92292-y), 2021-06-18
Supplement: 41598_2021_92292_MOESM1_ESM.pdf [file 41598_2021_92292_MOESM1_ESM.pdf]

## ***Supplementary materials***

### **High level of fatty liver index predicts new onset of diabetes mellitus during a 10-year period in healthy subjects**

Yukimura Higashiura<sup>1\*</sup>, Masato Furuhashi<sup>1\*†</sup>, Marenao Tanaka<sup>1\*</sup>, Satoko Takahashi<sup>1</sup>, Masayuki Koyama<sup>1,2</sup>, Hirofumi Ohnishi<sup>1,2</sup>, Keita Numata<sup>3</sup>, Takashi Hisasue<sup>3</sup>, Nagisa Hanawa<sup>3</sup>, Norihito Moniwa<sup>1</sup>, Kazufumi Tsuchihashi<sup>1</sup>, Tetsuji Miura<sup>1</sup>

*\*The first three authors equally contributed to this work.*

<sup>1</sup>Department of Cardiovascular, Renal and Metabolic Medicine, Sapporo Medical University School of Medicine; <sup>2</sup>Department of Public Health, Sapporo Medical University School of Medicine, Sapporo, Japan; <sup>3</sup>Department of Health Checkup and Promotion, Keijinkai Maruyama Clinic, Sapporo, Japan

# Supplementary Table S1

Supplementary Table S1. Summary of studies regarding the association between the development of diabetes mellitus and FLI level.

| Authors                | Year | Country | Subjects    | Number               | Age (years)  | Duration | Subgroups of FLI  | Regression analysis | Divided |                   | Refs          |            |
|------------------------|------|---------|-------------|----------------------|--------------|----------|-------------------|---------------------|---------|-------------------|---------------|------------|
|                        |      |         |             | All (M/F)            | (range/mean) | (years)  |                   | by A*               | by B*   | by sex            |               |            |
| Balkau B, et al.       | 2010 | France  | GP          | 3,811 (1,861/1,950)  | 30-65 / 47   | 9        | < 20, 20-69, ≥ 70 | Logistic            | (+)     | (-)               | (+)           | 18         |
| Jung CH, et al.        | 2013 | Korea   | GP          | 7,860 (5,154/2,706)  | 20-83 / 49   | 4        | < 20, 20-59, ≥ 60 | Logistic            | (+)     | (-)               | (-, Adjusted) | 19         |
| Yadav D et al.         | 2016 | Korea   | GP          | 2,784 (944/1,840)    | 40-70 / 55   | 2.6      | < 30, 30-59, ≥ 60 | Logistic            | (+)     | (-)               | (-, Adjusted) | 20         |
| Jager S, et al.        | 2015 | Germany | GP          | 1,922 (707/1,215)    | ? / 49       | 8        | < 30, 30-59, ≥ 60 | Cox proportional    | (+)     | (-)               | (+)           | 21         |
| Franch-Nadal J, et al. | 2018 | Spain   | Prediabetes | 1,142 (574/568)      | 30-74 / ?    | 2.8      | < 30, 30-59, ≥ 60 | Cox proportional    | (+)     | (-)               | (-, Adjusted) | 22         |
| Wargny M, et al.       | 2019 | France  | Prediabetes | 389 (252/137)        | ? / 58       | 3.9      | < 30, 30-59, ≥ 60 | Cox proportional    | (-)     | (+)               | (-, Adjusted) | 23         |
| Olubamwo OO, et al.    | 2019 | Finland | Male only   | 1,792 (1792/ -)      | 42-60 / 53   | 18.8     | < 30, 30-59, ≥ 60 | Cox proportional    | (+)     | (-)               | NA            | 24         |
| Hirata A, et al.       | 2018 | Japan   | GP          | 4,439 (1,498/2,941)  | 40-74 / 65   | 3        | Tertile (+/- IFG) | Cox proportional    | (+)     | (-)               | (+)           | 25         |
| Higashiura Y, et al    | 2021 | Japan   | GP          | 12,290 (7,925/4,365) | 19-96 / 48   | 9.5      | Tertile (+/- IFG) | Cox proportional    | (+)     | (+, Cubic spline) | (+)           | This study |

FLI, fatty liver index; GP, general population; IFG, impaired fasting glucose; NA, not applicable.  
A\*: analysis using categorized subgroups of FLI. B\*: analysis using FLI level as a continuous variable.

## Supplementary Table S2

Supplementary Table S2. Characteristics of the enrolled and excluded subjects.

|                                   | Total<br>n = 28,890 | Enrolled<br>n = 12,290 | Excluded<br>n = 16,600 | P      |
|-----------------------------------|---------------------|------------------------|------------------------|--------|
| Age (years)                       | 45 ± 13             | 48 ± 10                | 42 ± 14                | <0.001 |
| Sex (male/female)                 | 17888 (61.9)        | 7,925 (64.5)           | 9,963 (60.0)           | <0.001 |
| Body mass index                   | 22.9 ± 3.5          | 23.2 ± 3.4             | 22.7 ± 3.7             | <0.001 |
| Waist circumference (cm)          | 82.4 ± 9.8          | 83.4 ± 9.2             | 81.3 ± 10.3            | <0.001 |
| Systolic blood pressure (mmHg)    | 116 ± 17            | 117 ± 16               | 115 ± 17               | <0.001 |
| Diastolic blood pressure (mmHg)   | 73 ± 11             | 74 ± 11                | 73 ± 11                | <0.001 |
| Smoking habit                     | 10,235 (35.4)       | 4,231 (34.4)           | 6,004 (36.2)           | <0.001 |
| Alcohol drinking habit            | 11,817 (40.9)       | 5,634 (45.8)           | 6,183 (37.2)           | <0.001 |
| Family history                    |                     |                        |                        |        |
| Diabetes mellitus                 | 5,041 (17.4)        | 2,115 (17.2)           | 2,926 (17.6)           | 0.49   |
| Comorbidity                       |                     |                        |                        |        |
| Hypertension                      | 4,351 (15.1)        | 2,068 (16.8)           | 2,283 (13.8)           | <0.001 |
| Dyslipidemia                      | 6,194 (21.4)        | 2,720 (22.1)           | 3,474 (20.9)           | 0.006  |
| Biochemical data                  |                     |                        |                        |        |
| Albumin (g/dL)                    | 4.4 ± 0.2           | 4.4 ± 0.2              | 4.4 ± 0.2              | 0.307  |
| eGFR (mL/min/1.73m <sup>2</sup> ) | 85.2 ± 15.3         | 84.5 ± 14.6            | 86.0 ± 16.0            | <0.001 |
| Uric acid (mg/dL)                 | 5.4 ± 1.4           | 5.5 ± 1.4              | 5.4 ± 1.4              | <0.001 |
| FPG (mg/dL)                       | 93 ± 20             | 90 ± 9                 | 95 ± 25                | <0.001 |
| Hemoglobin A1c (%)                | 5.4 ± 0.7           | 5.2 ± 0.4              | 5.7 ± 1.1              | <0.001 |
| AST (U/L)                         | 23 (18-25)          | 23 (18-26)             | 23 (17-25)             | <0.001 |
| ALT (U/L)                         | 26 (14-30)          | 26 (15-31)             | 25 (14-29)             | <0.001 |
| γGTP (U/L)                        | 47 (18-52)          | 50 (19-56)             | 44 (17-49)             | <0.001 |
| Total cholesterol (mg/dL)         | 202 ± 35            | 204 ± 34               | 200 ± 35               | <0.001 |
| LDL cholesterol (mg/dL)           | 119 ± 32            | 122 ± 31               | 117 ± 32               | <0.001 |
| HDL cholesterol (mg/dL)           | 62 ± 16             | 61 ± 16                | 62 ± 16                | <0.001 |
| non-HDL cholesterol (mg/gL)       | 141 ± 37            | 144 ± 35               | 138 ± 37               | <0.001 |
| Triglycerides (mg/dL)             | 111 (60-133)        | 113 (63-136)           | 109 (57-131)           | <0.001 |
| FLI                               | 28.4 (6.2-45.7)     | 30.1 (7.9-48.2)        | 26.4 (4.9-42.2)        | <0.001 |

Variables are expressed as number (%), means ± SD or medians (interquartile ranges).

AST, aspartate aminotransferase; ALT, alanine aminotransferase; eGFR, estimated glomerular filtration rate; FLI, fatty liver index; FPG, fasting plasma glucose; γGTP; γ-glutamyl transferase; HDL, high-density lipoprotein; LDL, low-density lipoprotein.

## Supplementary Table S3

Supplementary Table S3. Multivariable Cox proportional hazard analyses for new onset of DM in tertiles of FLI in subjects without alcohol drinking habit.

|                      | Male (n = 3,433) |         | Female (n = 3,223) |         |
|----------------------|------------------|---------|--------------------|---------|
|                      | HR (95% CI)      | P       | HR (95% CI)        | P       |
| FLI                  |                  |         |                    |         |
| T1                   | Reference        | -       | Reference          | -       |
| T2                   | 2.00 (1.20-3.35) | 0.008   | 0.98 (0.49-1.98)   | 0.956   |
| T3                   | 3.57 (2.21-5.78) | < 0.001 | 1.87 (1.00-3.49)   | 0.049   |
| Age (per 1 year)     | 1.03 (1.01-1.04) | 0.003   | 1.01 (0.99-1.03)   | 0.442   |
| FPG (per 1 mg/dL)    | 1.12 (1.10-1.13) | < 0.001 | 1.11 (1.09-1.13)   | < 0.001 |
| Smoking habit        | 1.58 (1.19-2.09) | 0.002   | 1.31 (0.75-2.31)   | 0.347   |
| Family history of DM | 0.73 (0.44-1.18) | 0.194   | 0.79 (0.36-1.71)   | 0.548   |
| Hypertension         | 0.96 (0.69-1.33) | 0.796   | 1.13 (0.66-1.93)   | 0.678   |
| Dyslipidemia         | 2.12 (1.36-3.30) | < 0.001 | 2.14 (1.04-4.43)   | 0.039   |
|                      | AIC = 3,064      |         | AIC = 1,345        |         |

AIC, Akaike's information criterion; CI, confidence interval; DM, diabetes mellitus; FLI, fatty liver index; FPG, fasting plasma glucose; HR, hazard ratio.

## Supplementary Table S4

Supplementary Table S4. Multivariable Cox proportional hazard regression analyses for new onset of DM in tertiles of FLI in the absence and presence of IFG in subjects without alcohol drinking habit..

|                 | n     | HR (95% CI)      | P       |
|-----------------|-------|------------------|---------|
| Male subjects   | 3,433 |                  |         |
| IFG (-)         |       |                  |         |
| T1              | 1,212 | Reference        | -       |
| T2              | 961   | 1.79 (0.96-3.34) | 0.068   |
| T3              | 792   | 4.86 (2.78-8.50) | < 0.001 |
| IFG (+)         |       |                  |         |
| T1              | 109   | 8.99 (4.21-19.2) | < 0.001 |
| T2              | 148   | 16.6 (8.96-30.6) | < 0.001 |
| T3              | 211   | 28.8 (16.6-49.9) | < 0.001 |
| Female subjects | 3,223 |                  |         |
| IFG (-)         |       |                  |         |
| T1              | 1,106 | Reference        | -       |
| T2              | 1,008 | 1.37 (0.61-3.04) | 0.444   |
| T3              | 918   | 2.60 (1.24-5.42) | 0.011   |
| IFG (+)         |       |                  |         |
| T1              | 20    | 15.3 (4.19-55.7) | < 0.001 |
| T2              | 46    | 13.8 (5.17-36.7) | < 0.001 |
| T3              | 125   | 24.5 (11.6-51.7) | < 0.001 |

CI, confidence interval; DM, diabetes mellitus; FLI, fatty liver index; HR, hazard ratio; IFG, impaired fasting glucose.

IFG was defined as fasting plasma glucose  $\geq$  100 mg/dL.

The model was adjusted for age, smoking habit, alcohol drinking habit, family history of DM, hypertension and dyslipidemia.
